# Supplementary material
Source: PubMed Central journal article supplement (PMC3084129)
Supplement: 1009188108_pnas.201009188SI.pdf [file 1009188108_pnas.201009188SI.pdf]

# Supporting Information

Sakai et al. 10.1073/pnas.1009188108

## SI Materials and Methods

**Antibodies.** The following antibodies were used for immunocytochemistry and Western blot analysis: anti-myc 4A6 antibody (1:3,000 for Western blotting; Millipore), anti-myc 9E10 antibody (1:800 for immunocytochemistry; Santa Cruz Biotechnology), anti-myosin VIIA antibody (1:200 for immunocytochemistry; Abcam), anti-myosin VIIA antibody (1:1,000 for Western blotting; Santa Cruz Biotechnology), anti-Erk antibody (K23; Santa Cruz Biotechnology), anti-N-cadherin antibody (BD Biosciences), and anti-MyRip antibody (Sigma). Anti-myosin IIB (1:5,000 for Western blotting) was kindly provided by R. Adelstein (National Institutes of Health, Bethesda, MD).

**Western Blot Analysis.** Proteins separated by SDS/PAGE were transferred to a PVDF membrane (Bio-Rad) in a tank apparatus at 70 V for 30 min. The membrane was blocked with 3% nonfat dry milk and 0.05% Tween 20 in Tris-buffered saline for 1 h. For endogenous myosin VIIA detection, the membrane was blocked with 5% normal rabbit serum and 0.05% Tween 20 in Tris-buffered saline for 1 h. The membrane was incubated with primary antibodies, followed by HRP-conjugated secondary antibodies (BioRad). Detection was performed with Super Signal West Pico (Pierce Chemical).

**Cell Culture and Transfection.** HeLa cells (ATCC) and COS7 cells (ATCC) were cultured with DMEM containing 10% FBS. Human retinal pigmented epithelial (ARPE-19) cells (ATCC) were cultured with DMEM/F12 with 10% FBS and 2 mM L-glutamine (Invitrogen). Both cells were kept at 37 °C with 5% CO<sub>2</sub>. Transient transfections were performed with GeneJammer Transfection Reagent (Stratagene) according to the manufacturer's instructions. Plasmid DNA was purified by using Qiagen minior Maxiprep columns. The cells were observed under the confocal microscope at ~14 h after transfection.

**Confocal Microscopy.** Fluorescence images were viewed with a Leica DM IRB laser-scanning confocal microscope controlled by Leica TCS SP II systems (Leica Microsystems) equipped with a Plan-Apochromat 60× 1.40 N.A. oil-immersion objective (Leica). The images were processed by using Adobe Photoshop software. Time-lapse images were obtained by sequential epifluorescent and phase illumination at 37 °C. Movie files were created with QuickTime (Apple).

**Immunofluorescence Staining.** Cells cultured on glass coverslips were fixed in a fixation buffer (4% formaldehyde, 2 mM MgCl<sub>2</sub>, and 1 mM EGTA in PBS) for 20 min at room temperature, washed twice with PBS, and permeabilized with 0.25% Triton X-100 in PBS for 10 min at room temperature. Cells were washed twice with PBS and blocked with 5% BSA in PBS for 1 h at room temperature. The cells were incubated at 4 °C overnight with the indicated primary antibodies and subsequently for 1 h with the fluorescence-labeled secondary antibodies (Alexa Fluor 568- or 647-conjugated antibody; Molecular Probes). For actin staining, Alexa Fluor 568 or 647/phalloidin (Invitrogen) was used.

**Subcellular Fractionation.** At 24 h after the transfection, the cell pellets were snap-frozen in liquid nitrogen and stored at -80 °C. The cells were resuspended in 60 μL of Solution A [150 mM NaCl, 25 mM Hepes/NaOH (pH 7.4), 1 mM PMSF, 10 μg/mL leupeptin, 2 μg/mL pepstatin A, and 1 μg/mL trypsin inhibitor] and homogenized in a 1.5-mL tube with a pellet pestle (Kimble-Kontes) on ice. After adding 240 μL of Solution A, the samples were centrifuged at 22,000 × g for 5 min at 4 °C to remove the nuclear and crude plasma membrane (fraction PM). The supernatant was further centrifuged (600,000 × g) to separate the cytoplasm fraction (supernatants, fraction Cy) and the small vesicle-containing fraction (pellets, fraction V).

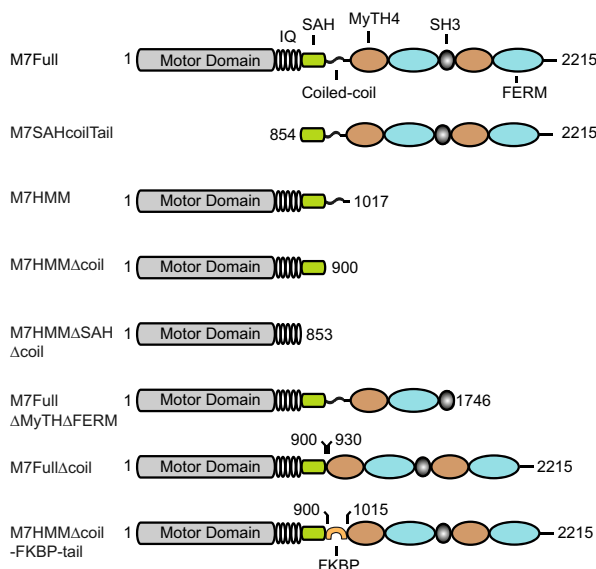

Fig. S1. Schematic diagram of myosin VIIA constructs used in this study. Numbers are amino acid numbers of human myosin VIIA.

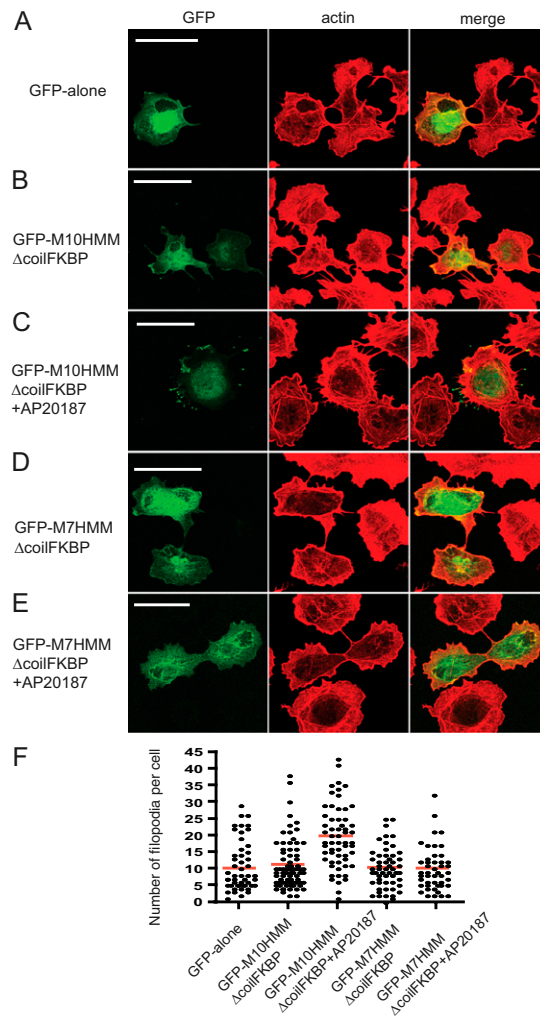

**Fig. S2.** Dimer formation of myosin VIIA does not induce filopodia/microspikes formation unlike myosin X. COS7 cells were transfected with GFP alone (A), M10HMM $\Delta$ coil-FKBP (B and C), or GFP-M7HMM $\Delta$ coil-FKBP (D and E). At 16 h after transfection, 100 nM AP20187 was added to the culture medium (C and E) and incubated for 30 min. After fixation, the cells were stained with Alexa Fluor 568/phalloidin (red). (Bars = 50  $\mu$ m.) (F) Quantitative analysis of filopodia/microspike induction by various myosin constructs. Dot-plot graph shows the distribution of the numbers of filopodia/microspike per cell, identified by F-actin staining. All peripheral filopodia with the length more than 2  $\mu$ m were counted for each transfected cells. Red bars show the average filopodial number per cell. The filopodial numbers were  $10.0 \pm 7.6$  (GFP alone,  $n = 54$ ),  $11.6 \pm 8.3$  (M10HMM $\Delta$ coil-FKBP,  $n = 76$ ),  $19.6 \pm 9.3$  (M10HMM $\Delta$ coil-FKBP+AP20187,  $n = 59$ ),  $10.2 \pm 6.0$  (M7HMM $\Delta$ coil-FKBP,  $n = 54$ ), and  $10.0 \pm 6.4$  (M7HMM $\Delta$ coil-FKBP+ AP20187,  $n = 46$ ). (Bars = 50  $\mu$ m.)

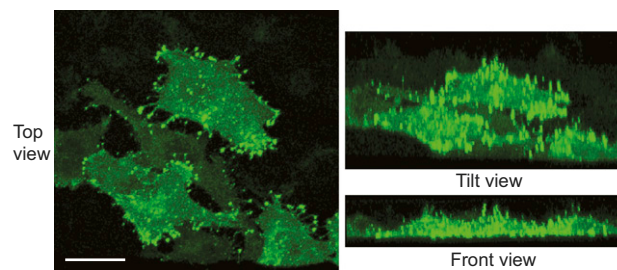

**Fig. S3.** GFP-M7HMM-FKBP localizes at the tip of both peripheral and dorsal filopodia upon dimer formation. HeLa cells expressing GFP-M7HMM-FKBP were fixed at 30 min after the addition of 100 nM AP20187. The 3D image was reconstructed from confocal optical slices from top to bottom in the cells. (Bars = 10  $\mu$ m.)

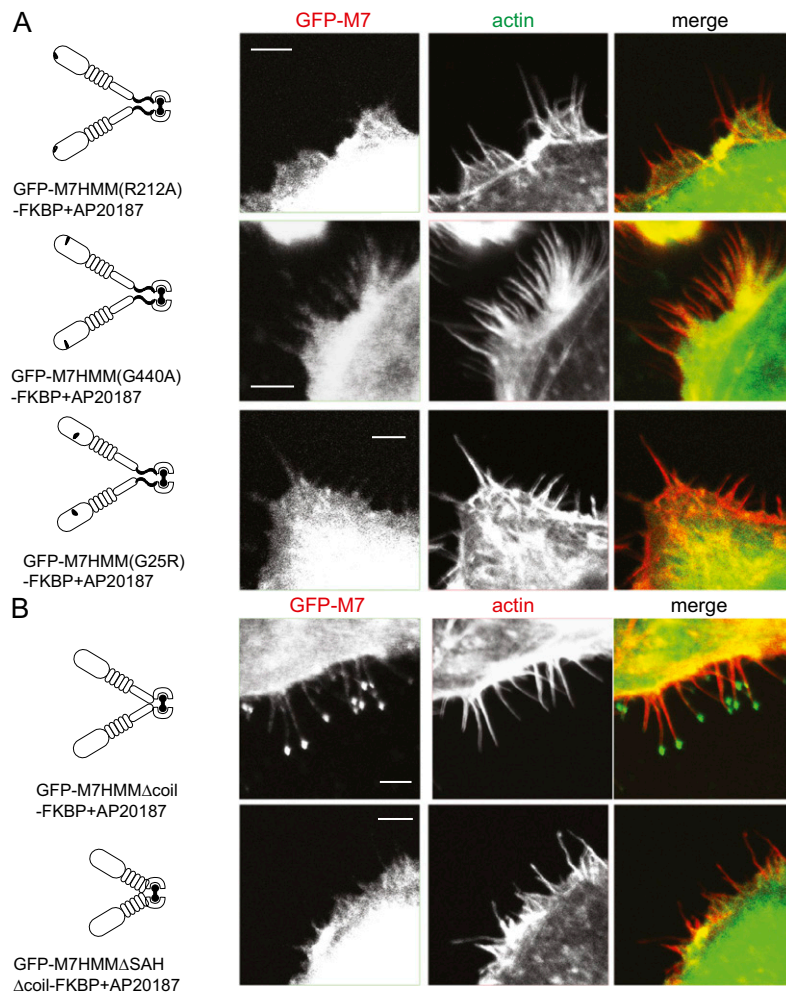

**Fig. 54.** The motor activity and proper neck length are required for the translocation of myosin VIIA to the tip of filopodia. (A) Disruption of the motor activity abolishes the filopodial tip localization of myosin VIIA constructs (GFP-M7HMM-FKBP). HeLa cells were transfected with R212A mutant (*Top*), G440A mutant (*Middle*), or G25A mutant (*Bottom*). (B) Elimination of the SAH domain abolishes the translocation of GFP-M7HMM-FKBP to the tip of filopodia. The myosin VIIA HMM construct without SAH domain (GFP-M7HMM $\Delta$ SAH $\Delta$ coil-FKBP) failed to show the tip localization in filopodia in contrast to the construct with SAH domain (GFP-M7HMM $\Delta$ coil-FKBP). The cells were fixed at 30 min after the addition of 100 nM AP20187 and stained with Alexa Fluor 568/phalloidin to monitor actin structure. (Bars = 10  $\mu$ m.)
